# Supplementary material
Source: publisher figshare collection journal article supplement (https://springernature.figshare.com/ndownloader/files/21929175)
Supplement: Supplementary file [file 21929175]

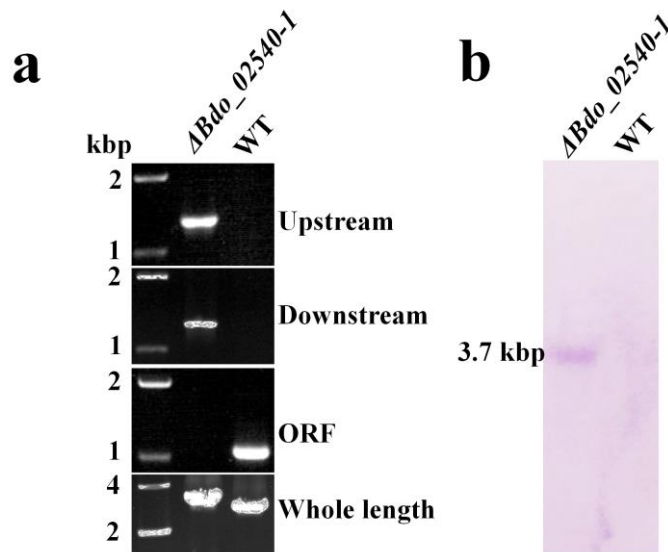

**Fig. S4** Verification of *Bdo\_02540* GD *B. dothidea* HTLW03 transformants

The *Bdo\_02540* GD transformant ( $\Delta Bdo\_02540-1$ ) was analyzed with four PCR amplifications and a Southern blot. **a**  $\Delta Bdo\_02540-1$  had the correct upstream and downstream fragments, lacked the ORF fragment, and had a longer whole-length fragment than the WT control. **b** Southern blot analysis of the *hph* insertion loci.
